# Supplementary material for: Comparing local perspectives on women’s health with statistics on maternal mortality: an ethnobotanical study in Bénin and Gabon
Source: PubMed Central journal article supplement (PMC3986651; doi:10.1186/1472-6882-14-113), 2014-03-28
Supplement: 1472-6882-14-113-S1.pdf [file 1472-6882-14-113-S1.pdf]

Additional file 1

Species cited in 46 questionnaires in Bénin: scientific botanical name, name in local language(s), used plant part, preparation, use category and AMT collection number

| Botanical Name                                           | Local Name <sup>a</sup>                                | Used part          | Preparation <sup>b</sup> | Use category <sup>c</sup>                                              | AMT# <sup>d</sup>   |
|----------------------------------------------------------|--------------------------------------------------------|--------------------|--------------------------|------------------------------------------------------------------------|---------------------|
| <i>Abrus precatorius</i> L.                              | degbeybegbey (F),<br>yekpeyekpeman (F), viviman<br>(N) | root, leaves       | T                        | contraception, infertility, pregnancy                                  | NC                  |
| <i>Acacia nilotica</i> (L.) Delile                       | bonni (F)                                              | seeds              | T                        | menstruation                                                           | 338                 |
| <i>Acanthospermum hispidum</i><br>DC.                    | togbama (M), kpononmi (N)                              | plant, leaves      | T                        | HBP, infertility, pregnancy                                            | 376,<br>381,<br>535 |
| <i>Acmella caulirhiza</i> Delile                         | awlekekpe (S)                                          | plant              | T                        | postpartum hemorrhage                                                  | 397                 |
| <i>Acridocarpus smeathmannii</i><br>(DC.) Guill. & Perr. | gbanguinan (F)                                         | root, bark         | T                        | anemia                                                                 | 300,<br>355,<br>599 |
| <i>Acrostichum aureum</i> L.                             | Sofoco (S)                                             | leaves             | T                        | pregnancy                                                              | NC                  |
| <i>Aframomum melegueta</i><br>K.Schum.                   | atakoun (F)                                            | fruit              | T                        | childbirth, galactagogue, menstruation, STIs                           | 309                 |
| <i>Azelia africana</i> Pers.                             | aguakpogoto (F)                                        | bark               | VW                       | STIs                                                                   | 362                 |
| <i>Aganope stuhlmannii</i> (Taub.)<br>Adema              | siensiendo (F)                                         | root, bark         | T                        | infertility, menstruation                                              | NC                  |
| <i>Agelaea pentagyna</i> (Lam.)<br>Baill.                | ahouanhlazou (S)                                       | leaves             | T                        | pregnancy                                                              | 383                 |
| <i>Albizia adianthifolia</i> (Schum.)<br>W.Wight         | awagotingoto (F)                                       | bark               | T                        | menstruation                                                           | 369                 |
| <i>Allium cepa</i> L.                                    | petite onion (Fr)                                      | stem               | V, T, VW, A              | galactagogue, HBP, infertility, menstruation, postpartum<br>infections | 117                 |
| <i>Allium sativum</i> L.                                 | aiyo (G)                                               | stem               | T, D                     | childbirth, cysts, fibroids, HBP, menstruation                         | NC                  |
| <i>Aloe macrocarpa</i> Tod.                              | aloes (M)                                              | leaves             | J                        | anemia                                                                 | 487                 |
| <i>Ampelocissus leonensis</i><br>(Hook.f.) Planch.       | tekple (N)                                             | plant              | T                        | infertility, pregnancy                                                 | 320                 |
| AMT 271                                                  | indi (T)                                               | root               | T                        | postpartum infections                                                  | 271                 |
| <i>Anacardium occidentale</i> L.                         | cadjou (F)                                             | bark, leaves, root | T, VW, HB                | HBP, infertility, STIs, postpartum infections, pregnancy               | 331                 |
| <i>Ananas comosus</i> (L.) Merr.                         | ananas (Fr)                                            | fruit              | T                        | anemia                                                                 | NC                  |
| <i>Anchomanes cf. difformis</i><br>(Blume) Engl.         | agohouéhè do (F)                                       | root               | T                        | infertility                                                            | 315                 |
| <i>Annickia polycarpa</i> (DC.)<br>Setten & Maas         | atahé (F)                                              | bark               | T                        | menstruation                                                           | NC                  |

| Botanical Name                                                             | Local Name <sup>a</sup>                       | Used part                      | Preparation <sup>b</sup> | Use category <sup>c</sup>                                                                                                                               | AMT# <sup>d</sup> |
|----------------------------------------------------------------------------|-----------------------------------------------|--------------------------------|--------------------------|---------------------------------------------------------------------------------------------------------------------------------------------------------|-------------------|
| <i>Annona muricata</i> L.                                                  | shapshap (F)                                  | leaves                         | T                        | HBP, STIs                                                                                                                                               | NC                |
| <i>Annona senegalensis</i> Pers.                                           | nyuglo (F), bejunongley (M),<br>tineybobo (T) | leaves, root                   | E, P, T                  | childbirth, STIs, pregnancy                                                                                                                             | 602,<br>644       |
| <i>Anthocleista</i> sp.                                                    | clabalabagoto (F)                             | bark                           | T                        | intestinal cleanse                                                                                                                                      | 523               |
| <i>Anthocleista vogelii</i> Planch.                                        | gotoundo (F)                                  | root, leaves, wood             | T                        | infertility, intestinal cleanse, stomachache                                                                                                            | 348               |
| <i>Arachis hypogaea</i> L.                                                 | arachide (Fr)                                 | seeds                          | E                        | galactagogue, pregnancy                                                                                                                                 | NC                |
| <i>Argemone mexicana</i> L.                                                | wetcheyon (G)                                 | leaves                         | T, VW                    | pregnancy, STIs, vaginal cleanse                                                                                                                        | NC                |
| <i>Artocarpus</i> cf. <i>altilis</i><br>(Parkinson ex F.A.Zorn)<br>Fosberg | blèfutu asu (M)                               | leaves                         | T                        | HBP                                                                                                                                                     | NC                |
| <i>Asteraceae</i> sp.                                                      | atentebe (T)                                  | plant                          | T                        | stomach ache                                                                                                                                            | 292               |
| <i>Azadirachta indica</i> A.Juss.                                          | kini (F)                                      | leaves                         | T                        | abortion, pregnancy, stomachache                                                                                                                        | NC                |
| <i>Baphia nitida</i> Lodd.                                                 | sokpèkpè (F)                                  | wood                           | T, A                     | contraception, cysts, fibroids, intestinal cleanse,<br>menstruation, postpartum cleanse                                                                 | 319               |
| <i>Barteria</i> cf. <i>nigritana</i> Hook.f.                               | oko goto (F)                                  | bark                           |                          | anemia                                                                                                                                                  | NC                |
| <i>Bauhinia thonningii</i> Schum.                                          | kloman (F), banmo (T)                         | leaves                         | E, T                     | pregnancy, HBP                                                                                                                                          | 647               |
| <i>Beta vulgaris</i> L.                                                    | la betterave (Fr)                             | root                           | E                        | anemia                                                                                                                                                  | NC                |
| <i>Blighia</i> cf. <i>unijugata</i> Baker                                  | agboviawondo (N)                              | bark                           | T                        | intestinal cleanse                                                                                                                                      | NC                |
| <i>Boerhavia erecta</i> L.                                                 | tikpatikpalala (T)                            | leaves                         | E                        | pregnancy                                                                                                                                               | 298               |
| <i>Bridelia ferruginea</i> Benth.                                          | houssoukokoé (F)                              | root, leaves, bark             | T, A, VW                 | anemia, contraception, infertility, menstruation,<br>postpartum infections, STIs, vaginal cleanse                                                       | NC                |
| <i>Bryophyllum pinnatum</i> (Lam.)<br>Oken                                 | afitiman (S)                                  | leaves                         | T                        | postpartum cleanse                                                                                                                                      | NC                |
| <i>Burkea africana</i> Hook.                                               | atapa (T)                                     | leaves                         | E                        | pregnancy                                                                                                                                               | 646               |
| <i>Caesalpinia bonduc</i> (L.) Roxb.                                       | adjikuiman (F)                                | seeds, leaves, root            | D, E, T, W               | childbirth, diuretic, infertility, menstruation, postpartum<br>bleeding, postpartum cleanse, postpartum infections,<br>pregnancy, STIs, vaginal cleanse | 484,<br>651       |
| <i>Caesalpinia pulcherrima</i> (L.)<br>Sw.                                 | orgueil de chine (Fr)                         | fruit (young), leaves,<br>bark | T, P                     | HBP, infections                                                                                                                                         | 480               |
| <i>Cajanus cajan</i> (L.) Millsp.                                          | eweotini (N)                                  | leaves                         | T                        | menstruation                                                                                                                                            | NC                |
| <i>Caladium bicolor</i> (Aiton)<br>Vent.                                   | wèkènoukoun (F)                               | plant                          | TC                       | menopause cause                                                                                                                                         | 568               |
| <i>Calotropis gigantea</i> (L.)<br>Dryand.                                 | kpinto (F)                                    | leaves                         | T                        | cough                                                                                                                                                   | NC                |
| <i>Canna</i> cf. <i>indica</i> L.                                          | sidakin (G)                                   | plant                          | T                        | STIs                                                                                                                                                    | NC                |
| <i>Capsicum annuum</i> L.                                                  | pimment (Fr)                                  | fruit                          | T, P, EN, A              | cysts, fibroids, hemorrhoids- internal, HBP, intestinal<br>cleanse                                                                                      | 256               |
| <i>Carica papaya</i> L.                                                    | kpiman (F,G)                                  | leaves, fruit, root            | T, D                     | anemia, galactagogue, infertility, contraception, cysts,<br>fibroids, HBP, pregnancy, menstruation, vaginal cleanse                                     | NC                |
| <i>Carissa spinarum</i> L.                                                 | ahouanzodo (F)                                | root                           | T, VW, A                 | anemia, cysts, fibroids, menstruation, postpartum                                                                                                       | 332,              |

| Botanical Name                                     | Local Name <sup>a</sup>         | Used part            | Preparation <sup>b</sup> | Use category <sup>c</sup>                                                                                                                               | AMT# <sup>d</sup>   |
|----------------------------------------------------|---------------------------------|----------------------|--------------------------|---------------------------------------------------------------------------------------------------------------------------------------------------------|---------------------|
|                                                    |                                 |                      |                          | infections, STIs                                                                                                                                        | 373,<br>504,<br>524 |
| <i>Cassytha filiformis</i> L.                      | agbégbékan (F)                  | plant                | T, VW                    | pregnancy, vaginal cleanse, infertility                                                                                                                 | 326                 |
| <i>Ceiba pentandra</i> (L.) Gaertn.                | kpatindèhoun (F), batidenia (M) | leaves               | D                        | childbirth                                                                                                                                              | 567                 |
| <i>Celosia cf. argentea</i> L.                     | soman (G)                       | leaves               | T                        | anemia                                                                                                                                                  | NC                  |
| <i>Celtis cf. zenkeri</i> Engl.                    | agbohingla (S)                  | bark                 | T                        | cysts, fibroids                                                                                                                                         | NC                  |
| <i>Ceratotheca sesamoides</i> Endl.                | komokuile (T), agboma (F)       | leaves, whole plant  | D, E, T                  | anemia, childbirth, pregnancy                                                                                                                           | 655                 |
| <i>Chamaecrista mimosoides</i> (L.) Greene         | kilafimitche (S)                | plant                | VW                       | STIs                                                                                                                                                    | 389                 |
| <i>Chamaecrista rotundifolia</i> (Pers.) Greene    | azima (F, G)                    | leaves, whole plant  | VW, T                    | infertility, pregnancy, STIs                                                                                                                            | NC                  |
| <i>Chassalia kolly</i> (Schumach.) Hepper          | djètindo (F)                    | root                 | T                        | childbirth, intestinal cleanse, cysts, fibroids, menstruation                                                                                           | 187,<br>328         |
| <i>Chromolaena odorata</i> (L.) R.M.King & H.Rob.  | agatou (F, G, N)                | leaves               | T, VW                    | vaginal cleanse                                                                                                                                         | NC                  |
| <i>Chrysophyllum albidum</i> G.Don                 | azongogoegoto (G)               | bark                 | T                        | galactagogue                                                                                                                                            | NC                  |
| <i>Chrysopogon sp.</i>                             | tékanwannon (F)                 | plant                | T                        | menstruation                                                                                                                                            | 339                 |
| <i>Cissampelos mucronata</i> A.Rich                | djokodje (K)                    | leaves               | T                        | postpartum hemorrhage                                                                                                                                   | 515                 |
| <i>Cissampelos mucronata</i> A.Rich.               | djokodjè (F, G)                 | leaves, whole plant  | T                        | infertility, CBD loudjo, infertility, menstruation, pregnancy                                                                                           | 314                 |
| <i>Cissampelos owariensis</i> P.Beauv. ex DC.      | tjokodje (F)                    | leaves               | D                        | infertility, pregnancy                                                                                                                                  | NC                  |
| <i>Cissus populnea</i> Guill. & Perr.              | dedo (F)                        | root                 | D                        | childbirth                                                                                                                                              | 122                 |
| <i>Citrullus colocynthis</i> (L.) Schrad.          | tchègba (F), kaka (T)           | leaves, seeds, fruit | E, T                     | STIs, intestinal cleanse, pregnancy                                                                                                                     | 238,<br>303         |
| <i>Citrullus lanatus</i> (Thunb.) Matsum. & Nakai  | wanyiwanyikoun (F)              | fruit                | T                        | intestinal cleanse                                                                                                                                      | 505                 |
| <i>Citrus aurantiifolia</i> (Christm.) Swingle     | clé (F, G)                      | leaves, fruit, root  | E, EA, T                 | childbirth, galactagogue, HBP, intestinal cleanse, menstruation, pregnancy, breast inflammation, postpartum cleanse, postpartum infections, infertility | 345                 |
| <i>Citrus sp.</i>                                  | klèman (F)                      | leaves, root, fruit  | T                        | HBP, menstruation, pregnancy, intestinal cleanse, menstruation, stomachache                                                                             | 347                 |
| <i>Clausena anisata</i> (Willd.) Hook.f. ex Benth. | gbozohoun (F)                   | leaves, bark, root   | VW, T                    | menstruation, postpartum infections, STIs                                                                                                               | 330,<br>576         |
| <i>Cleistopholis patens</i> (Benth.) Engl. & Diels | hounsoué do (F, G, N)           | bark, leaves, root   | T                        | infertility, intestinal cleanse, pregnancy                                                                                                              | 375                 |

| Botanical Name                                                  | Local Name <sup>a</sup> | Used part                       | Preparation <sup>b</sup> | Use category <sup>c</sup>                                              | AMT# <sup>d</sup> |
|-----------------------------------------------------------------|-------------------------|---------------------------------|--------------------------|------------------------------------------------------------------------|-------------------|
| <i>Cleome viscosa</i> L.                                        | agatouma (F)            | plant                           | VW                       | STIs                                                                   | NC                |
| <i>Cnestis ferruginea</i> Vahl ex DC.                           | akpaflo (F)             | seeds, root                     | T                        | menstruation, anemia                                                   | 340               |
| <i>Cochlospermum planchonii</i> Hook.f. ex Planch.              | betou (T)               | leaves                          | E                        | pregnancy                                                              | 656               |
| <i>Cocos nucifera</i> L.                                        | agodo (F, G, N)         | fruit, root, seeds, fruit water | D, T                     | anemia, galactagogue, cysts, fibroids, HBP, yellow fever, menstruation | 370, 378          |
| <i>Combretum cf. grandiflorum</i> G.Don                         | adounsitoman (G, S)     | leaves                          | D, T                     | childbirth, infertility                                                | NC                |
| <i>Commelina erecta</i> L.                                      | tchankoko (F)           | rhizome                         | T                        | menstruation                                                           | 334               |
| <i>Corchorus olitorius</i> L.                                   | krenkren (F)            | leaves, root                    | E, T                     | food, menstruation                                                     | 166               |
| <i>Costus lucanusianus</i> J.Braun & K.Schum.                   | tetregoudou (G)         | plant                           | T                        | cysts, fibroids                                                        | 372               |
| <i>Costus sp.</i>                                               | tetregouman (S)         | leaves                          | T                        | intestinal cleanse, vaginal cleanse                                    | NC                |
| <i>Crateva adansonii</i> DC.                                    | hontonzonzouin (F)      | leaves                          | T, VW                    | HBP, menstruation, STIs, vaginal cleanse                               | NC                |
| <i>Crescentia cujete</i> L.                                     | kamma (F)               | leaves                          | D                        | intestinal cleanse                                                     | NC                |
| <i>Croton gratissimus</i> Burch.                                | jelele (F)              | leaves, bark, root              | T, P                     | CBD loudjo, childbirth, HBP, menstruation, pregnancy                   | 327               |
| <i>Cucumeropsis cf. mannii</i> Naudin                           | goussitchègba (F, G)    | seeds                           | T                        | infertility, intestinal cleanse, menstruation                          | NC                |
| <i>Curculigo pilosa</i> (Schumach. & Thonn.) Engl.              | ayote (F)               | tuber                           | V, D, T                  | galactagogue, intestinal cleanse, menstruation                         | 118, 333          |
| <i>Curcuma sp.</i>                                              | chyaoumkoko (F)         | rhizome                         |                          | infections                                                             | 196               |
| <i>Cyanthillium cinereum</i> (L.) H.Rob.                        | hunsikusey (F)          | plant, leaves                   | T                        | CBD loudjo, contraception, pregnancy,                                  | 540, 595          |
| <i>Cymbopogon citratus</i> (DC.) Stapf                          | teeman (F, N)           | leaves                          | T                        | anemia, childbirth, galactagogue, pregnancy, stomachache               | NC                |
| <i>Cynometra megalophylla</i> Harms                             | bougoto (F, N, G)       | bark                            | T                        | anemia                                                                 | NC                |
| <i>Daniellia oliveri</i> (Rolfe) Hutch. & Dalziel               | nyado (F), inya (T)     | leaves, bark, wood              | E, D, HB, P              | pregnancy, galactagogue, infertility                                   | 584, 652          |
| <i>Desmodium gangeticum</i> (L.) DC.                            | zèdali (F, N, G)        | leaves, whole plant             | T, D                     | childbirth, infertility, pregnancy                                     | 316               |
| <i>Desmodium velutinum</i> (Willd.) DC.                         | bandowo (F, N, G)       | leaves, whole plant, fruit      | T, VW                    | CBD loudjo, HBP, menstruation, pregnancy                               | 250, 508          |
| <i>Dialium guineense</i> Willd.                                 | loma (M)                | leaves                          | D, E                     | galactagogue, intestinal cleanse, vegetable                            | 481               |
| <i>Dichapetalum madagascariense</i> Poir.                       | gbago (F)               | leaves                          | T                        | cysts, fibroids, HBP, pregnancy, menstruation                          | 142, 169          |
| <i>Diodella sarmentosa</i> (Sw.) Bacigalupo & Cabral ex Borhidi | sèhwi (F, G)            | plant, leaves                   | T                        | infertility, menstruation, pregnancy                                   | 317, 528          |
| <i>Dioscorea sp.</i>                                            | gando (F)               | root, fruit                     | T                        | cysts, fibroids, menstruation, anemia                                  | 357               |

| Botanical Name                                                         | Local Name <sup>a</sup>   | Used part                                     | Preparation <sup>b</sup> | Use category <sup>c</sup>                                                | AMT# <sup>d</sup>  |
|------------------------------------------------------------------------|---------------------------|-----------------------------------------------|--------------------------|--------------------------------------------------------------------------|--------------------|
| <i>Dysphania ambrosioides</i> (L.) Mosyakin & Clemants                 | godo (F), amantrouzou (F) | plant, leaves                                 | EA, VW, T                | menstruation, postpartum infections, STIs, vaginal cleanse               | 479, 519           |
| <i>Ehretia cymosa</i> Thonn.                                           | mionman (F), bodomey (T)  | leaves                                        | E, T                     | menstruation, pregnancy, HBP                                             | 380, 657           |
| <i>Elaeis guineensis</i> Jacq.                                         | l'huile rouge (Fr)        | seeds, oil from seeds, infructescence, leaves | E, EA, HB, T             | galactagogue, internal hemorrhoids, HBP, muscle pain, fatigue, pregnancy | 578                |
| <i>Eleusine indica</i> (L.) Gaertn.                                    | akpi (K)                  | leaves                                        | D                        | childbirth                                                               | 513                |
| <i>Entada africana</i> Guill. & Perr.                                  | kpakpassoumehaman (S)     | leaves                                        | T                        | contraception                                                            | 394                |
| <i>Entada gigas</i> (L.) Fawc. & Rendle                                | gbagbara (F)              | seeds, bark                                   | T                        | infertility, pregnancy                                                   | NC                 |
| <i>Erythrina senegalensis</i> DC.                                      | pbaklesido (F)            | bark, root                                    | T                        | anemia, contraception, infertility, menstruation, pregnancy              | 131, 527           |
| <i>Fabaceae</i> sp.                                                    | fonvi (S)                 | plant                                         | T                        | menstruation                                                             | NC                 |
| <i>Ficus sur</i> Forssk.                                               | agpoto (T)                | root, leaves                                  | T                        | anemia, pregnancy                                                        | 293, 388, 510, 653 |
| <i>Flacourtia indica</i> (Burm. f.) Merr.                              | gbohouncadjè (F)          | root, leaves                                  | T, D                     | anemia, pregnancy                                                        | 127, 356           |
| <i>Flacourtia</i> sp.                                                  | gbougbadjo (G)            | wood                                          | T                        | intestinal cleanse                                                       | 371                |
| <i>Flueggea virosa</i> (Roxb. ex Willd.) Royle                         | tcheke-tcheke (F)         | leaves                                        | T                        | fever, intestinal cleanse, malaria, pregnancy                            | 193                |
| <i>Fulvifomes</i> cf. <i>fastuosus</i> (Lév.) Bondartseva & S. Herrera | chutin (F)                | fungus                                        | T                        | infertility                                                              | 123                |
| <i>Ganoderma</i> sp.                                                   | djouatin (F)              | fungus                                        | T                        | pregnancy                                                                | NC                 |
| <i>Garcinia kola</i> Heckel                                            | ahowo (G)                 | wood                                          | T                        | menstruation                                                             | 368                |
| <i>Garcinia</i> sp.                                                    | kola (F)                  | bark, seeds                                   | T, E                     | anemia                                                                   | NC                 |
| <i>Gardenia ternifolia</i> Schumach. & Thonn.                          | adakpla (F)               | plant, root, leaves                           | T                        | HBP, malaria, pregnancy                                                  | 301, 510, 521, 564 |
| <i>Gladiolus dalenii</i> Van Geel                                      | baka (F)                  | stem                                          | T                        | menstruation                                                             | 335                |
| <i>Gmelina arborea</i> Roxb.                                           | fofitin (F)               | leaves                                        | T                        | HBP                                                                      | 359                |
| <i>Gomphrena celosioides</i> Mart.                                     | papatajè (K)              | plant                                         | T                        | HBP                                                                      | 516                |
| <i>Gossypium barbadense</i> L.                                         | tchekey                   | plant                                         |                          |                                                                          | 612                |
| <i>Gossypium hirsutum</i> L.                                           | avokanfochekey (F)        | leaves                                        | D, T                     | anemia                                                                   | NC                 |
| <i>Grewia</i> cf. <i>carpinifolia</i> Juss.                            | oriman (G)                | leaves                                        | T                        | pregnancy                                                                | NC                 |
| <i>Gymnosporia senegalensis</i> (Lam.) Loes.                           | yedoman (F)               | leaves, bark                                  | T                        | cysts, fibroids                                                          | NC                 |
| <i>Helianthus</i> sp.                                                  | botiowo (T)               | leaves                                        | EN                       | intestinal cleanse                                                       | 278                |

| Botanical Name                                                   | Local Name <sup>a</sup>      | Used part           | Preparation <sup>b</sup> | Use category <sup>c</sup>                                                                                                                                   | AMT# <sup>d</sup>   |
|------------------------------------------------------------------|------------------------------|---------------------|--------------------------|-------------------------------------------------------------------------------------------------------------------------------------------------------------|---------------------|
| <i>Heliotropium indicum</i> L.                                   | koklusu danpaja (M)          | plant, leaves       | D, T                     | childbirth, HBP                                                                                                                                             | 522                 |
| <i>Heterotis rotundifolia</i> (Sm.)<br>Jacq.-Fél.                | hêhêman (F)                  | leaves, bark        | T, D, VW                 | anemia, childbirth, cysts, fibroids, HBP, infertility, menstruation, pregnancy, protection against sorcery, postpartum infections, STIs                     | NC                  |
| <i>Hibiscus acetosella</i> Welw. ex<br>Hiern                     | podey (M)                    | leaves              | T                        | anemia                                                                                                                                                      | 151                 |
| <i>Hibiscus sabdariffa</i> L.                                    | bissap (Fr)                  | leaves              | T                        | cysts, fibroids, pregnancy                                                                                                                                  | 485                 |
| <i>Hibiscus surattensis</i> L.                                   | kpofin (F, G, N)             | plant, leaves       | T                        | anemia, infertility, pregnancy                                                                                                                              | 150,<br>310,<br>503 |
| <i>Hymenocardia acida</i> Tul.                                   | fefeya (T), orukpa (T)       | leaves              | E                        | pregnancy                                                                                                                                                   | 641,<br>649         |
| <i>Hyptis suaveolens</i> (L.) Poit.                              | kulubi (T)                   | leaves, root        | E, T                     | galactagogue, STIs, pregnancy, stomachache                                                                                                                  | 275,<br>536         |
| <i>Imperata cylindrica</i> (L.)<br>Raeusch.                      | cekunu (F), eweekan (N)      | leaves              | VW                       | pregnancy, vaginal cleanse                                                                                                                                  | NC                  |
| <i>Indigofera hirsuta</i> L.                                     | zogbeyzi (M)                 | leaves              | T                        | pregnancy                                                                                                                                                   | 170                 |
| <i>Indigofera pulchra</i> Willd.                                 | azima (F)                    | plant               | T                        | pregnancy                                                                                                                                                   | 614                 |
| <i>Ipomoea aquatic</i> Forssk.                                   | ahinandje (S)                | plant               | T                        | postpartum hemorrhage                                                                                                                                       | 399                 |
| <i>Ipomoea batatas</i> (L.) Poir.                                | patat douce (Fr)             | leaves              | T                        | contraception                                                                                                                                               | NC                  |
| <i>Irvingia gabonensis</i> (Aubry-<br>Lecomte ex O'Rorke) Baill. | bègbègma (M), asroma (M)     | leaves              | T                        | diarrhea, dysentery, hemorrhoids                                                                                                                            | 482                 |
| <i>Jatropha curcas</i> L.                                        | yinkpotin (N), eweakporo (N) | leaves              | T, HB, VW                | anemia, HBP, malaria, menstruation, stomachache                                                                                                             | 263,<br>483         |
| <i>Jatropha gossypifolia</i> L.                                  | yokpotinmannovo (N)          | root                | T                        | anemia                                                                                                                                                      | 353,<br>572         |
| <i>Justicia flava</i> (Vahl) Vahl                                | tchoutchougboutchou (F, S)   | leaves, whole plant | T                        | anemia, menstruation                                                                                                                                        | 393                 |
| <i>Khaya senegalensis</i> (Desv.)<br>A.Juss.                     | zouzou (F), kasesral (F)     | bark, leaves        | A, T, D, HB,<br>VW       | abortion, anemia, cysts, fibroids, HBP, infertility, menstruation, postpartum cleanse, postpartum infections, pregnancy, STIs, stomachache, vaginal cleanse | 121,<br>284,<br>526 |
| <i>Kigelia africana</i> (Lam.) Benth.                            | gnanblikpo (F)               | leaves, bark, fruit | EA, T                    | breast inflammation, cysts, fibroids, infertility, intestinal cleanse, menstruation, stomachache                                                            | 249,<br>342,<br>396 |
| <i>Lannea acida</i> A.Rich.                                      | akou (T)                     | bark                | T                        | anemia                                                                                                                                                      | 282                 |
| <i>Lannea barteri</i> (Oliv.) Engl.                              | houmansitékannon (F)         | bark, leaves        | T                        | anemia, menstruation                                                                                                                                        | 351                 |
| <i>Lantana camara</i> L.                                         | hlatchayo (F)                | leaves, whole plant | T, VW                    | postpartum infections, STIs, vaginal cleanse                                                                                                                | NC                  |
| <i>Laportea aestuans</i> (L.) Chew                               | kesukesu (F)                 | plant               | T                        | menstruation                                                                                                                                                | 111                 |
| <i>Lippia multiflora</i> Moldenke                                | yinya (F)                    | leaves              | T, VW                    | cysts, fibroids, STIs, vaginal cleanse                                                                                                                      | 311                 |
| <i>Lippia</i> sp.                                                | aglala (F)                   | leaves              | T, VW                    | HBP, menstruation, postpartum infections, STIs, vaginal cleanse                                                                                             | NC                  |

| <b>Botanical Name</b>                                           | <b>Local Name<sup>a</sup></b>   | <b>Used part</b>     | <b>Preparation<sup>b</sup></b> | <b>Use category<sup>c</sup></b>                                                                                                                               | <b>AMT#<sup>d</sup></b> |
|-----------------------------------------------------------------|---------------------------------|----------------------|--------------------------------|---------------------------------------------------------------------------------------------------------------------------------------------------------------|-------------------------|
| <i>Lycopodiella cernua</i> (L.) Pic. Serm.                      | hingble (F, S)                  | plant                | P, T                           | childbirth, pregnancy                                                                                                                                         | 132                     |
| <i>Mallotus oppositifolius</i> (Geiseler) Müll.Arg.             | adji (T), cecewima (M)          | plant, leaves        | E, T                           | intestinal cleanse, postpartum cleanse, postpartum infections                                                                                                 | 168                     |
| <i>Mangifera indica</i> L.                                      | amangagoto (F, G, N)            | leaves, bark         | HB, T                          | anemia, pregnancy                                                                                                                                             | 191, 382                |
| <i>Manihot esculenta</i> Crantz                                 | kootema (F)                     | leaves               | D                              | anemia                                                                                                                                                        | NC                      |
| <i>Melaleuca leucadendra</i> (L.) L.                            | kpimansin semeton (S)           | leaves               | D                              | childbirth                                                                                                                                                    | 395                     |
| <i>Merremia tridentata</i> (L.) Hallier f.                      | fakale (G)                      | leaves               | T                              | infertility                                                                                                                                                   | NC                      |
| <i>Milicia excelsa</i> (Welw.) C.C.Berg                         | lokoma (F)                      | leaves               | T                              | contraception                                                                                                                                                 | NC                      |
| <i>Millettia thonningii</i> (Schum. & Thonn.) Baker             | assandjouman (S)                | leaves               | T                              | postpartum hemorrhage                                                                                                                                         | 398                     |
| <i>Millettia thonningii</i> (Schum. & Thonn.) Baker             | assoinssoin (F), otietie (G, N) | leaves, bark         | T                              | anemia, galactagogue, infertility, intestinal cleanse, pregnancy, vaginal cleanse                                                                             | 501                     |
| <i>Mimosa quadrivalvis</i> var. <i>leptocarpa</i> (DC.) Barneby | ahossiboasa (F)                 | leaves               | T, D                           | HBP, childbirth, HBP, pregnancy                                                                                                                               | 302, 581                |
| <i>Mitragyna inermis</i> (Willd.) Kuntze                        | lagpatima (M)                   | leaves               | T                              | STIs                                                                                                                                                          | 171                     |
| <i>Momordica charantia</i> L.                                   | gninsinkin (F)                  | plant, fruit, leaves | EA, E, T, VW                   | abortion, anemia, contraception, HBP, intestinal cleanse, postpartum infections, STIs, pregnancy, vaginal cleanse                                             | 361                     |
| <i>Monodora myristica</i> (Gaertn.) Dunal                       | sassalikoun (F)                 | bark, seeds          | A, T, V, VW                    | anemia, galactagogue, infertility, menstruation, postpartum infections, STIs                                                                                  | 119, 184, 308           |
| <i>Morinda lucida</i> Benth.                                    | koinsido (F)                    | leaves, root, bark   | A, T                           | abortion, anemia, contraception, cysts, fibroids, intestinal cleanse, postpartum cleanse, menstruation                                                        | 112, 321                |
| <i>Moringa oleifera</i> Lam.                                    | kpatiman (F, G), patovide (M)   | leaves, bark         | E, P, T, VW                    | childbirth, cysts, fibroids, HBP, STIs, pregnancy                                                                                                             | NC                      |
| <i>Newbouldia laevis</i> (P.Beauv.) Seem.                       | dèsèsigièma (F), akoko (N)      | leaves               | T, D                           | anemia, HBP, pregnancy                                                                                                                                        | NC                      |
| <i>Nicotiana</i> cf. <i>tabacum</i> L.                          | azoma (F)                       | leaves               | V                              | galactagogue                                                                                                                                                  | NC                      |
| <i>Ocimum americanum</i> L.                                     | hissihissi (F)                  | plant, leaves        | T, HB, VW                      | postpartum infections, pregnancy, STIs, vaginal cleanse                                                                                                       | 701                     |
| <i>Ocimum basilicum</i> L.                                      | kesukesu (M)                    | leaves               | T                              | menstruation                                                                                                                                                  | 143                     |
| <i>Ocimum gratissimum</i> L.                                    | tchayo (F, G), koumoba (T)      | leaves, whole plant  | D, T, VW, HB                   | anemia, breast milk purifier, contraception, intestinal cleanse, menstruation, postpartum cleanse, postpartum infections, pregnancy, STIs, vaginal cleanse    | NC                      |
| <i>Ocimum</i> sp.                                               |                                 | plant, leaves        | E, EA, T, D, VW                | anemia, fatigue, HBP, infertility, intestinal cleanse, menstruation, muscle pain, postpartum infections, pregnancy, STIs, vaginal cleanse, vaginal infections | NC                      |
| <i>Olox subscorpioidea</i> Oliv.                                | mitindo (F, G, N)               | root                 | T                              | cysts, fibroids, infertility, intestinal cleanse, menstruation                                                                                                | 329                     |

| Botanical Name                                         | Local Name <sup>a</sup>      | Used part           | Preparation <sup>b</sup> | Use category <sup>c</sup>                                            | AMT# <sup>d</sup> |
|--------------------------------------------------------|------------------------------|---------------------|--------------------------|----------------------------------------------------------------------|-------------------|
| <i>Oldenlandia affinis</i> (Roem. & Schult.) DC.       | ahonhoun (F, G)              | plant, leaves       | T                        | childbirth, infertility                                              | 206, 313          |
| <i>Parinari curatellifolia</i> Planch. ex Benth.       | iyafa (T)                    | leaves              | E                        | pregnancy                                                            | 650               |
| <i>Parkia biglobosa</i> (Jacq.) G.Don                  | ahouagoto (F)                | leaves, bark, seeds | T, D, P, EN              | hemorrhoids-internal, HBP, postpartum cleanse                        | 384               |
| <i>Paullinia pinnata</i> L.                            | hèdoulifindo (F)             | root, leaves        | A, E, D, T, VW           | anemia, contraception, HBP, menstruation, pregnancy                  | 125               |
| <i>Pavetta corymbosa</i> (DC.) F.N.Williams            | lohoun (F)                   | root, leaves        | D, T, VW                 | infertility, pregnancy, vaginal cleanse                              | 312               |
| <i>Pennisetum cf. glaucum</i> (L.) R.Br.               | mil (Fr)                     | leaves              | D, T                     | anemia                                                               | NC                |
| <i>Peperomia pellucida</i> (L.) Kunth                  | fifaman (F)                  | leaves              | T                        | infertility                                                          | 323               |
| <i>Pergularia daemia</i> (Forssk.) Chiov.              | abognufufu (T)               | leaves              | E                        | galactagogue, pregnancy                                              | 283, 640          |
| <i>Periploca calophylla</i> (Baill.) Roberty           | honman (F)                   | leaves              | T                        | pregnancy                                                            | NC                |
| <i>Persea americana</i> Mill.                          | avocaman (F, G)              | leaves              | T, D                     | anemia, HBP, malaria, pregnancy                                      | NC                |
| <i>Phaulopsis ciliata</i> (Willd.) Hepper              | chouchougrouchou (F)         | plant               |                          | protection against spirits                                           | 200               |
| <i>Phyllanthus amarus</i> Schumach. & Thonn.           | hlinwé (F, G)                | plant, leaves       | E, T, VW                 | HBP, intestinal cleanse, menstruation, postpartum cleanse, pregnancy | 239, 344, 642     |
| <i>Phyllanthus muellerianus</i> (Kuntze) Exell         | agemukogu (T)                | root                | T                        | anemia                                                               | 296               |
| <i>Phymatosorus scolopendria</i> (Burm. f.) Pic. Serm. | degoma (F, G, N)             | leaves              | VW, T                    | STIs, pregnancy                                                      | 120, 377          |
| <i>Physalis cf. angulata</i> L.                        | korogba (N)                  | plant               | T, VW                    | STIs, vaginal cleanse                                                | NC                |
| <i>Piper guineense</i> Schumach. & Thonn.              | piment du guinea (Fr)        | fruit, leaves       | E, T                     | contraception, CBD loudjo, pregnancy                                 | NC                |
| <i>Platostoma africanum</i> P.Beauv.                   | koumobaokuta (T)             | leaves              | E                        | pregnancy                                                            | 648               |
| <i>Polygala arenaria</i> Willd.                        | mli (F)                      | plant               |                          | infection                                                            | 205               |
| <i>Portulaca oleracea</i> L.                           | denkama (F)                  | plant               | EA                       | pregnancy                                                            | 110               |
| <i>Prosopis africana</i> (Guill. & Perr.) Taub.        | kakema (F)                   | plant               | T, HB, VW                | postpartum infections                                                | NC                |
| <i>Psidium guajava</i> L.                              | guave (Fr)                   | fruit               | E                        | pregnancy                                                            | NC                |
| <i>Pterocarpus erinaceus</i> Poir.                     | kosso (G, S), eweakpekpe (N) | bark, leaves        | T                        | anemia, cysts, fibroids, menstruation                                | 379               |
| <i>Pterocarpus santalinoides</i> DC.                   | gbètin (F)                   | leaves              | T                        | infertility, stomachache                                             | NC                |
| <i>Pycnanthus angolensis</i>                           | yayado (F)                   | root                | T                        | anemia                                                               | NC                |



| Botanical Name                                                               | Local Name <sup>a</sup>             | Used part                    | Preparation <sup>b</sup> | Use category <sup>c</sup>                                                                                                                                                           | AMT# <sup>d</sup>           |
|------------------------------------------------------------------------------|-------------------------------------|------------------------------|--------------------------|-------------------------------------------------------------------------------------------------------------------------------------------------------------------------------------|-----------------------------|
| (Welw.) Warb.                                                                |                                     |                              |                          |                                                                                                                                                                                     |                             |
| <i>Raphia sp.</i>                                                            | dema (F, M)                         | wood, leaves                 | T                        | placenta removal                                                                                                                                                                    | NC                          |
| <i>Rauvolfia vomitoria</i> Afzel.                                            | vonmausin (G)                       | leaves                       | T                        | pregnancy                                                                                                                                                                           | 374                         |
| <i>Rhaphiostylis beninensis</i><br>(Hook.f. ex Planch.) Planch.<br>ex Benth. | kplakplakando (F)                   | wood, leaves, root           | T, D                     | intestinal cleanse, menstruation, postpartum cleanse                                                                                                                                | 129<br>500                  |
| <i>Ricinus communis</i> L.                                                   | tondedji (F)                        | leaves                       | D                        | abortion, intestinal cleanse, menstruation                                                                                                                                          | NC                          |
| <i>Rourea coccinea</i> (Schumach.<br>& Thonn.) Benth.                        | vikplomba (F, G, S)                 | leaves                       | T, E                     | anemia, infertility                                                                                                                                                                 | 167                         |
| <i>Sabicea calycina</i> Benth.                                               | aviama (F, S)                       | plant, leaves                | VW                       | STIs, pregnancy                                                                                                                                                                     | 391                         |
| <i>Saccharum officinarum</i> L.                                              | canne asucre (Fr)                   | stem                         | T                        | anemia                                                                                                                                                                              | NC                          |
| <i>Sansevieria sp.</i>                                                       | kpoyando (G)                        | root                         | T                        | infertility                                                                                                                                                                         | NC                          |
| <i>Sarcocephalus latifolius</i> (Sm.)<br>E.A.Bruce                           | kodo (F, G), umbesi (T)             | root                         | T, M, D                  | abortion, anemia, childbirth, cysts, fibroids, galactagogue,<br>infertility, intestinal cleanse, menstruation, postpartum<br>cleanse, postpartum infections, pregnancy, stomachache | 295                         |
| <i>Schwenkia americana</i> L.                                                | zron (F)                            | plant                        | D, T                     | childbirth, pregnancy                                                                                                                                                               | 324,<br>352                 |
| <i>Secamone afzelii</i> (Roem. &<br>Schult.) K.Schum.                        | zoucoutou (F), anonsiman (F)        | plant, leaves                | E, T                     | anemia, galactagogue, infertility, postpartum infections,<br>pregnancy                                                                                                              | 322,<br>349,<br>639,<br>597 |
| <i>Securidaca longipedunculata</i><br>Fresen.                                | abiwèrè (F, G, N)                   | leaves                       | T, D, VW                 | childbirth, infertility, menstruation, postpartum cleanse,<br>pregnancy, vaginal cleanse                                                                                            | 318,<br>336                 |
| <i>Senna alata</i> (L.) Roxb.                                                | amasou (F)                          | leaves, flower               | T, A                     | cysts, fibroids, intestinal cleanse, menstruation                                                                                                                                   | 343,<br>502                 |
| <i>Senna italica</i> Mill.                                                   | agwègbé (F)                         | leaves                       | D, T                     | constipation, intestinal cleanse                                                                                                                                                    | 307                         |
| <i>Senna obtusifolia</i> (L.)<br>H.S.Irwin & Barneby                         | kpanwoun (S)                        | leaves                       | T                        | anemia                                                                                                                                                                              | NC                          |
| <i>Senna occidentalis</i> (L.) Link                                          | agonlika (F), ajambulu (T)          | leaves                       | EN                       | intestinal cleanse                                                                                                                                                                  | 241                         |
| <i>Senna siamea</i> (Lam.)<br>H.S.Irwin & Barneby                            | cassia (F, M)                       | leaves                       | T, HB                    | abortion, childbirth, postpartum cleanse, CBD loudjo,<br>menstruation, pregnancy                                                                                                    | 165                         |
| <i>Sesamum indicum</i> L.                                                    | sesame (Fr)                         | plant, seeds                 | E, A                     | menstruation, postpartum infections, pregnancy                                                                                                                                      | NC                          |
| <i>Sida acuta</i> Burm.f.                                                    | agbegbema (F), etchokotou<br>(G, N) | leaves, root, whole<br>plant | D, E, T, VW              | contraception, intestinal cleanse, menstruation,<br>postpartum cleanse, pregnancy                                                                                                   | 509,<br>534,<br>611         |
| <i>Sida cf. cordifolia</i> L.                                                | agbidi (F)                          | leaves                       | T                        | postpartum hemorrhage                                                                                                                                                               | NC                          |
| <i>Smilax anceps</i> Willd.                                                  | agbaliklaklan (F)                   | root                         |                          | cysts, fibroids, menstruation                                                                                                                                                       | 186                         |
| <i>Solanum aethiopicum</i> L.                                                | gblèman (F)                         | leaves                       | EA                       | STIs, vaginal cleanse                                                                                                                                                               | 566                         |
| <i>Sorghum arundinaceum</i><br>(Desv.) Stapf                                 | jehooma (M)                         | leaves                       | T                        | STIs                                                                                                                                                                                | 172                         |

| Botanical Name                                           | Local Name <sup>a</sup>                            | Used part           | Preparation <sup>b</sup> | Use category <sup>c</sup>                                                                                          | AMT# <sup>d</sup>           |
|----------------------------------------------------------|----------------------------------------------------|---------------------|--------------------------|--------------------------------------------------------------------------------------------------------------------|-----------------------------|
| <i>Sorghum bicolor</i> (L.) Moench                       | adako (F), okaono (T)                              | leaves              | T                        | anemia, menstruation                                                                                               | 247                         |
| <i>Sorghum sp.</i>                                       | le sorgho (Fr)                                     | seeds               | EA                       | infections                                                                                                         | NC                          |
| <i>Spathodea campanulata</i><br>P.Beauv.                 | adade (G, N, S)                                    | plant, leaves, bark | T, VW                    | HBP, infertility, menstruation, pregnancy, STIs                                                                    | 363,<br>390                 |
| <i>Spondias mombin</i> L.                                | akikon (F)                                         | leaves, bark        | T, VW                    | HBP, malaria, menstruation, vaginal cleanse                                                                        | 128,<br>360,<br>494,<br>635 |
| <i>Stachytarpheta cayennensis</i><br>(Rich.) Vahl        | alotrohe (S)                                       | plant               | T                        | menstruation                                                                                                       | 387                         |
| <i>Stereospermum kunthianum</i><br>Cham.                 | adjadey (T)                                        | leaves, root        | E, CS                    | pregnancy                                                                                                          | 643                         |
| <i>Strophanthus hispidus</i> DC.                         | tchakpa (F), inchao (T)                            | root, leaves        | E, T                     | childbirth, cysts, fibroids, menstruation, pregnancy, stomachache                                                  | 277,<br>350,<br>358         |
| <i>Struchium sparganophorum</i><br>(L.) Kuntze           | acodigoue (S)                                      | plant               | T                        | anemia                                                                                                             | 385                         |
| <i>Syzygium aromaticum</i> (L.)<br>Merr. & L.M.Perry     | atinkingbadota (F)                                 | flower buds         | T, V, A, VW              | anemia, galactagogue, contraception, infertility, intestinal<br>cleanse, menstruation, postpartum infections, STIs | 116                         |
| <i>Syzygium guineense</i> (Willd.)<br>DC.                | mlammido (N)                                       | root                | VW                       | vaginal cleanse                                                                                                    | NC                          |
| <i>Tapinanthus globiferus</i> Tiegh.                     | hansimlin (F)                                      | leaves              | T                        | anemia                                                                                                             | 571                         |
| <i>Tectona grandis</i> L.f.                              | teckdo (F)                                         | leaves, root        | HB, T                    | anemia                                                                                                             | NC                          |
| <i>Terminalia glaucescens</i><br>Planch. ex Benth.       | alotoun (F)                                        | root, leaves        | T, VW                    | intestinal cleanse, menstruation, vaginal cleanse                                                                  | 305,<br>627                 |
| <i>Tetrapleura tetraptera</i><br>(Schum. & Thonn.) Taub. | lindja (F)                                         | fruit               | VW, T                    | infertility, menstruation, postpartum infections, STIs,<br>vaginal cleanse                                         | 304                         |
| <i>Tridax procumbens</i> (L.) L.                         | kpokpo (F, G)                                      | plant               | T                        | anemia, cysts, menstruation                                                                                        | 512                         |
| <i>Uvaria chamae</i> P.Beauv.                            | aylahado (F)                                       | root, leaves        | T                        | anemia, infertility, menstruation, pregnancy                                                                       | 126,<br>529                 |
| <i>Vepris verdoorniana</i> (Exell &<br>Mendonça) Mziray  | agbede (S)                                         | leaves              | T, VW                    | anemia, contraception, infertility, menstruation                                                                   | 386                         |
| <i>Vernonia amygdalina</i> Delile                        | amavive (F)                                        | leaves, whole plant | E, HB, T                 | galactagogue, postpartum infection, pregnancy, vaginal<br>cleanse                                                  | 491,<br>645                 |
| <i>Vitex doniana</i> Sweet                               | foman (F)                                          | leaves, root        | T, A                     | hemorrhoids, menstruation                                                                                          | 570                         |
| <i>Waltheria indica</i> L.                               | atasu yonunuvima (F),<br>misomituwey (M), kasa (T) | Plant, leaves, root | D, T                     | anemia, infertility, intestinal cleanse, menstruation,<br>postpartum hemorrhage                                    | 130,<br>253,<br>565         |
| <i>Xylopi aethiopica</i> (Dunal)<br>A.Rich.              | kpédjrékoun (F)                                    | fruit               | T, A, VW                 | anemia, contraception, infertility, menstruation,<br>postpartum infections, STIs                                   | NC                          |

| Botanical Name                                               | Local Name <sup>a</sup> | Used part                       | Preparation <sup>b</sup> | Use category <sup>c</sup>                                                                                                                            | AMT# <sup>d</sup>   |
|--------------------------------------------------------------|-------------------------|---------------------------------|--------------------------|------------------------------------------------------------------------------------------------------------------------------------------------------|---------------------|
| <i>Zanthoxylum sp.</i>                                       | heja (M)                | leaves                          | T                        | intestinal cleanse                                                                                                                                   | NC                  |
| <i>Zanthoxylum zanthoxyloides</i><br>(Lam.) Zepern. & Timler | hêdo (F), chanuwele (T) | bark, root, leaves              | T, A, E                  | abortion, anemia, contraception, hemorrhoids- internal, intestinal cleanse, postpartum cleanse, menstruation, pregnancy, postpartum infections, STIs | 145,<br>288,<br>654 |
| <i>Zapoteca portoricensis</i> (Jacq.)<br>H.M.Hern.           | akanmoun (F)            | root                            | T, A                     | abortion, contraception                                                                                                                              | NC                  |
| <i>Zea mays</i> L.                                           | gbade (F)               | flower stigmas (silk),<br>fruit | T, D, E                  | anemia, galactagogue, cysts, fibroids                                                                                                                | NC                  |
| <i>Zingiber officinale</i> Roscoe                            | ata (T)                 | rhizome                         | A, T                     | cysts, fibroids, hemorrhoids- internal                                                                                                               | NC                  |

<sup>a</sup> Local languages are abbreviated: (F)= Fon; (Fr)= French; (G)= Goun; (M)= Mina; (N)= Nago; (S)= Seto; (T)= Tcha.

<sup>b</sup> Preparations are abbreviated: (A)= soaked in alcohol; (CS)= chew and spit; (D)= drink; (E)= eat; (EA)= external application; (EN) = enema; (HB)= herbal bath; (J)= juice; (M)= massage; (P)= powder; (T)= tea; (TC) = touch contact; (V)= vapor; (VW)= vaginal wash; (W)= waistband

<sup>c</sup> Use category abbreviations are as follows: CBD= cultural bound disease; HBP = high blood pressure; STIs= sexually transmitted infections.

<sup>d</sup> Botanical voucher number and collector initials; NC= not collected.
