# Supplementary material for: Comparing local perspectives on women’s health with statistics on maternal mortality: an ethnobotanical study in Bénin and Gabon
Source: PubMed Central journal article supplement (PMC3986651; doi:10.1186/1472-6882-14-113), 2014-03-28
Supplement: 1472-6882-14-113-S2.pdf [file 1472-6882-14-113-S2.pdf]

Additional file 2

Species cited in 41 questionnaires in Gabon: scientific botanical name, name local language(s), used plant part, preparation, use category and collection number

| Botanical Name                                             | Local Name <sup>a</sup>                                                | Used part           | Preparation <sup>b</sup> | Use category <sup>c</sup>                            | AMT# <sup>d</sup>                     |
|------------------------------------------------------------|------------------------------------------------------------------------|---------------------|--------------------------|------------------------------------------------------|---------------------------------------|
| <i>Abelmoschus esculentus</i> (L.) Moench                  | etatam (F), gombo (Fr), dongodongo(B), mibodo (B)                      | leaves, fruit       | EN, VI, E                | childbirth, pregnancy                                | 845                                   |
| <i>Abutilon mauritianum</i> (Jacq.) Medik.                 | odongi                                                                 |                     | D or EN                  | childbirth                                           | NC                                    |
| <i>Acalypha paniculata</i> Miq.                            | oekoenkoeakoen (F)                                                     | leaves              | VI                       | childbirth, pregnancy                                | 844                                   |
| <i>Acanthus montanus</i> (Nees) T.Anderson                 | nvovo (F), pachango (M)                                                | leaves              | EN, D, E, T              | childbirth, galactagogue, menstruation               | 1367, 1317                            |
| <i>Aframomum citratum</i> (C.Pereira) K.Schum.             | azum (F)                                                               | leaves, root        | EN                       | menstruation, stomachache before delivery            | NC                                    |
| <i>Aframomum giganteum</i> (Oliv. & D.Hanb.) K.Schum.      | obadzom (F)                                                            | fruit               | SiB                      | pregnancy                                            | NC                                    |
| <i>Aframomum</i> sp.                                       | piment indigiene (Fr), ontonou (Ob)                                    | fruit, leaves, stem | S, VI, EN, EA, D         | hemorrhoids, pregnancy, stomachache, vaginal cleanse | 1152                                  |
| <i>Afrostryax</i> cf. sp.                                  | mujumbu                                                                | bark                | EN, D                    | infertility, postpartum infections                   | NC                                    |
| <i>Ageratum conyzoides</i> (L.) L.                         | etombijoro (Om), hediki (M)                                            | plant, leaves       | VI, D                    | menstruation, vaginal cleanse                        | 1318                                  |
| <i>Albizia</i> sp.                                         | evovule sak (F)                                                        | leaves, plant       | VI, EN                   | cyst, stomachache, vaginal cleanse                   | 876, 1228                             |
| <i>Alchornea cordifolia</i> (Schumach. & Thonn.) Müll.Arg. | bonjay (B, M), nkabi (F), mabonja (S), mabunzi (Ok), mobonzibonzi (Os) | leaves, plant       | D, T, VW, VI             | anemia, HBP, malaria, STIs, vaginal cleanse          | 827, 838, 870, 1180, 1186, 1295, 1408 |
| <i>Allium cepa</i> L.                                      | oignon (Fr)                                                            | stem                | T                        | HBP                                                  | NC                                    |
| <i>Allium sativum</i> L.                                   | ail (Fr)                                                               | stem                | T                        | HBP                                                  | NC                                    |
| <i>Alstonia</i> cf. <i>boonei</i> De Wild.                 | ekoek (F)                                                              | bark                | D                        | vermifuge                                            | 855                                   |
| <i>Alstonia congensis</i> Engl.                            | makouka (B), okouka (M)                                                | bark                | T, D                     | bodyache, galactagogue, menstruation, stomachache    | 846, 1190                             |
| <i>Amaranthus cruentus</i> L.                              | folon (F)                                                              | leaves, plant       | EN, E                    | childbirth, contraception                            | 1240                                  |
| <i>Amaryllidaceae</i> sp.                                  | molongu (F)                                                            | tuber               | EN                       | pregnancy                                            | 869                                   |
| AMT 1277                                                   | moutey (B)                                                             | bark                | D                        | contraception                                        | 1277                                  |
| <i>Annickia affinis</i> (Exell) Versteegh & Sosef          | nfo (F)                                                                | bark                | D, T, VW, VI             | anemia, childbirth, HPB, pregnancy, STIs             | NC                                    |
| <i>Annona</i> cf. <i>senegalensis</i> Pers.                |                                                                        | root                | D                        | HBP                                                  | NC                                    |
| <i>Annona muricata</i> L.                                  | corossolier (Fr)                                                       | leaves, bark        | T, EN                    | HBP, pregnancy                                       | 871                                   |

| Botanical Name                                                 | Local Name <sup>a</sup>   | Used part           | Preparation <sup>b</sup> | Use category <sup>c</sup>                                                                                                        | AMT# <sup>d</sup> |
|----------------------------------------------------------------|---------------------------|---------------------|--------------------------|----------------------------------------------------------------------------------------------------------------------------------|-------------------|
| <i>Anonidium mannii</i> (Oliv.) Engl. & Diels                  | ebom (F)                  | bark                | EN                       | protect fetus, pregnancy                                                                                                         | NC                |
| <i>Anthocleista</i> cf. sp.                                    | ayindo (F)                | bark                | T                        | HBP                                                                                                                              | 765               |
| <i>Anthocleista vogelii</i> Planch.                            | monduando (B, M)          | bark, leaves        | D, E                     | general good health, HBP, menstruation, STIs                                                                                     | 1258              |
| <i>Antrocaryon klaineana</i> Pierre                            | angokon (F)               | bark                | T, EN, VW                | anemia, galactagogue, infertility, placenta removal, postpartum cleanse, postpartum infections, pregnancy, STIs, vaginal cleanse | 767, 1204         |
| <i>Aoranche cladantha</i> (K.Schum.) Somers                    | tchege (B, M), ibanza (M) | bark                | T, D                     | galactagogue, infertility, menstruation                                                                                          | 896, 1230, 1300   |
| <i>Asparagus warneckeii</i> (Engl.) Hutch.                     |                           | leaves, plant       | E, EN                    | vaginal cleanse, menstruation                                                                                                    | 1230              |
| <i>Asplenium</i> cf. <i>africanum</i> Desv.                    | ayan (F)                  | plant               | SiB                      | pregnancy                                                                                                                        | NC                |
| <i>Aucoumea klaineana</i> Pierre                               | nkomma (F)                |                     |                          | disinfectant                                                                                                                     | 823               |
| <i>Baillonella toxisperma</i> Pierre                           | moabi (F), adzap (F)      | bark                | D, EN, VW                | infertility, menstruation, placenta, postpartum cleanse, postpartum infections, vaginal cleanse, vermifuge                       | NC                |
| <i>Bambusa vulgaris</i> Schrad                                 | bambou de chine (Fr)      | leaves, stem        | D, T                     | HBP                                                                                                                              | 984               |
| <i>Brillantaisia owariensis</i> P.Beauv.                       | alembetorro (M)           | leaves              | VI                       | vaginal cleanse                                                                                                                  | NC                |
| <i>Caloncoba</i> cf. <i>welwitschii</i> (Oliv.) Gilg           | miamongon (F)             | bark                | VI                       | vaginal cleanse                                                                                                                  | NC                |
| <i>Canna indica</i> L.                                         | ekonzok (F)               | leaves              | HB                       | headache                                                                                                                         | 1233              |
| <i>Capsicum annuum</i> L                                       | petite piment (Fr)        | fruit, seeds        | EN, T, VW                | backache, childbirth, galactagogue, hemorrhoids, postpartum cleanse, postpartum infections, stomachache, vaginal cleanse         | NC                |
| <i>Carapa procera</i> DC.                                      | pongabonga (M)            | bark                | D                        | contraception                                                                                                                    | NC                |
| <i>Carica papaya</i> L.                                        | papaya (Fr)               | fruit, leaves, root | E, EN, T                 | galactagogue, contraception, HBP, STIs                                                                                           | NC                |
| <i>Carpolobia alba</i> G.Don                                   | onong (F)                 | root, leaves        | D, E                     | childbirth, HBP                                                                                                                  | NC                |
| <i>Cecropia</i> cf. <i>peltata</i> L.                          | parasolier (Fr)           | root                | D                        | infertility                                                                                                                      | NC                |
| <i>Ceiba pentandra</i> (L.) Gaertn.                            | baobab (Fr)               | bark                | D                        | anemia                                                                                                                           | 882               |
| <i>Chromolaena odorata</i> (L.) R.M.King & H.Rob.              | langalanga (Ob)           | leaves              | EA                       | sores                                                                                                                            | 1178              |
| <i>Cissus aralioides</i> (Welw. ex Baker) Planch.              | agondjie (F)              | leaves              | EN                       | menstruation                                                                                                                     | 867               |
| <i>Cissus</i> cf. <i>oreophila</i> Gilg & M.Brandt             |                           | cord, plant, leaves | T                        | pregnancy, menstruation                                                                                                          | 1296              |
| <i>Citrus aurantiifolia</i> (Christm.) Swingle                 | citron (Fr)               | fruit               | D, T                     | HBP, malaria, postpartum hemorrhage, pregnancy                                                                                   | NC                |
| <i>Cleistopholis</i> cf. <i>glauca</i> Pierre ex Engl. & Diels | nohoney (Ok)              | cord                | W                        | pregnancy                                                                                                                        | NC                |
| <i>Cleistopholis</i> cf. <i>patens</i> (Benth.) Engl. & Diels  | ohoey (B)                 | cord                | W                        | pregnancy                                                                                                                        | 1279              |
| <i>Clerodendrum formicarum</i> Gürke                           |                           | plant               | EN                       | pregnancy                                                                                                                        | 1236              |

| Botanical Name                                        | Local Name <sup>a</sup>                          | Used part          | Preparation <sup>b</sup> | Use category <sup>c</sup>                                                                                         | AMT# <sup>d</sup> |
|-------------------------------------------------------|--------------------------------------------------|--------------------|--------------------------|-------------------------------------------------------------------------------------------------------------------|-------------------|
| <i>Coelocaryon preussii</i> Warb.                     |                                                  | bark               | T                        | anemia                                                                                                            | 1305              |
| <i>Cola nitida</i> (Vent.) Schott & Endl.             | ngwan (F)                                        | seeds, bark        | EN                       | CBD les urines, childbirth                                                                                        | NC                |
| <i>Cola</i> sp.                                       | kola (F)                                         | seed, bark         | D, VW, E                 | childbirth                                                                                                        | NC                |
| <i>Combretum aphanopetalum</i> Engl. & Diels          | otoelefok (F)                                    | leaves             | VI                       | vaginal cleanse                                                                                                   | 866               |
| <i>Combretum racemosum</i> P.Beauv.                   | mosombasomba (Ok)                                | leaves             | VI                       | vaginal cleanse                                                                                                   | NC                |
| <i>Commelina</i> cf. <i>diffusa</i> Burm.f.           | essang (F)                                       | leaves             | VI                       | vaginal cleanse                                                                                                   | 1362              |
| <i>Costus afer</i> Ker Gawl.                          |                                                  | flower             | T                        | STIs                                                                                                              | NC                |
| <i>Costus</i> sp.                                     | myen (F)                                         | plant, leaves      | HB, D, EN                | anemia, fibroids, cysts, galactagogue, pregnancy, menstruation, postpartum hemorrhage, vaginal cleanse, vermifuge | NC                |
| <i>Cucumeropsis mannii</i> Naudin                     | inzaka (B, M),<br>concombre<br>traditionnel (Fr) | fruit, seeds       | D, E                     | childbirth, infertility                                                                                           | 854               |
| <i>Cyathula prostrata</i> (L.) Blume                  | diztaztu (Ok),<br>chabanakoko (B)                | flower, plant      |                          | HBP, vaginal cleanse                                                                                              | 1294, 1400        |
| <i>Cylicodiscus gabunensis</i> Harms                  | edum (F)                                         | bark               | D, HB, T                 | anemia, pregnancy, vermifuge                                                                                      | NC                |
| <i>Cymbopogon citratus</i> (DC.) Stapf                | tisane (Fr)                                      | leaves             | T                        | HBP                                                                                                               | NC                |
| <i>Cymbopogon</i> sp.                                 | citronelle (Fr)                                  | leaves, root, stem | SB, D, T                 | HBP, STIs, pregnancy                                                                                              | NC                |
| <i>Dacryodes</i> cf. <i>edulis</i> (G.Don)<br>H.J.Lam | osigi (Ob)                                       | leaves             | VI                       | vaginal cleanse                                                                                                   | 1181              |
| <i>Daniellia klainei</i> A.Chev.                      | oengay (B)                                       | bark               | T                        | contraception                                                                                                     | 1268              |
| <i>Desmodium adscendens</i> (Sw.) DC.                 | obumen zeney (F)                                 | leaves             | E                        | infertility                                                                                                       | NC                |
| <i>Dinophora spenneroides</i> Benth.                  | massessi (B)                                     | leaves             | VI                       | vaginal cleanse                                                                                                   | 1194              |
| <i>Dioscorea bulbifera</i> L.                         | ebouba (M)                                       | fruit              | EA                       | abscesses                                                                                                         | 1312              |
| <i>Dioscoreophyllum volkensii</i> Engl.               | tziga (F)                                        | plant              | D                        | postpartum hemorrhage                                                                                             | 1249              |
| <i>Drypetes</i> sp.                                   | esop (F)                                         | innerside bark     | VI                       | vaginal cleanse                                                                                                   | 878               |
| <i>Elaeis guineensis</i> Jacq.                        | essong (F)                                       | heart, oil, leaves | E, D                     | contraception, galactagogue, infertility, placenta removal                                                        | NC                |
| <i>Emilia coccinea</i> (Sims) G.Don                   | alonvoe (F)                                      | leaves             | D                        | menstruation                                                                                                      | 825               |
| <i>Ethulia</i> cf. <i>conyzoides</i> L.f.             |                                                  | leaves             | VI                       | postpartum infections                                                                                             | NC                |
| <i>Euphorbia hirta</i> L.                             | derebelli (Os)                                   | plant              | E                        | childbirth                                                                                                        | 1411              |
| <i>Ficus</i> cf. <i>thoningii</i> Blume               | atak (F)                                         | bark               | D, EN, HB                | galactagogue, infertility, pregnancy                                                                              | NC                |
| <i>Ficus exasperata</i> Vahl                          | ako (F)                                          | bark               | D                        | childbirth, pregnancy                                                                                             | 848               |
| <i>Ficus mucoso</i> Welw. ex Ficalho                  | ekoko (F)                                        | leaves, bark       | D, T                     | anemia, backache                                                                                                  | 826               |
| <i>Flagellaria</i> cf. <i>guineensis</i><br>Schumach. | enganisang (F)                                   | leaves             | EN                       | postpartum hemorrhage                                                                                             | NC                |
| <i>Fleroya ledermannii</i> (K.Krause)<br>Y.F.Deng     | tobu (M), epoukou<br>(M)                         | bark               | D                        | contraception, infertility, menstruation, pregnancy                                                               | 897               |
| <i>Funtumia africana</i> (Benth.) Stapf               | otanda (B)                                       | bark               | D, T                     | galactagogue                                                                                                      | 1287              |

| Botanical Name                                                     | Local Name <sup>a</sup>             | Used part      | Preparation <sup>b</sup> | Use category <sup>c</sup>                                       | AMT# <sup>d</sup> |
|--------------------------------------------------------------------|-------------------------------------|----------------|--------------------------|-----------------------------------------------------------------|-------------------|
| <i>Gnetum africanum</i> Welw.                                      | nkoumou (Ob)                        | leaves         | E                        | pregnancy                                                       | 824               |
| <i>Gossypium barbadense</i> L.                                     | coton (Fr)                          | leaves         | T, D                     | HBP, postpartum hemorrhage                                      | NC                |
| <i>Gouania longipetala</i> Hemsl.                                  | musangia (B)                        | bark           | D                        | vaginal cleanse                                                 | 1276              |
| <i>Guibourtia tessmannii</i> (Harms)<br>J.Leonard                  | obaka (B, M),<br>kevasingo (F)      | bark           | D, T                     | diabetes, HBP, infertility, postpartum hemorrhage,<br>pregnancy | 764               |
| <i>Halopegia azurea</i> (K.Schum.)<br>K.Schum.                     |                                     | leaves         | L                        | pregnancy                                                       | NC                |
| <i>Harungana madagascariensis</i> Lam.<br>ex Poir.                 | atuin (F)                           | leaves         | HB, E, D                 | HBP, postpartum infections, pregnancy                           | NC                |
| <i>Heterotis rotundifolia</i> (Sm.) Jacq.-<br>Fél.                 | ekaso (F)                           | plant          | VI                       | vaginal cleanse                                                 | 1248              |
| <i>Heterotis</i> sp.                                               | ekaso (F)                           | plant          | VI                       | STIs                                                            | NC                |
| <i>Hibiscus</i> sp.                                                | lesseille (F)                       | flower, leaves | D, E, VI                 | anemia, vaginal cleanse, pregnancy                              | NC                |
| <i>Hymenocardia acida</i> Tul.                                     | onganana (Ob)                       | leaves         | D                        | galactagogue                                                    | 1155              |
| <i>Hymenocardia ulmoides</i> Oliv.                                 | esang (F)                           | leaves         | VI                       | stomachache, vaginal cleanse                                    | 847               |
| <i>Inga edulis</i> Mart.                                           |                                     | seeds          | VW                       | fibroids, cysts                                                 | NC                |
| <i>Irvingia gabonensis</i> (Aubry-<br>Lecomte ex O'Rorke) Baill.   | andofan (F), mangue<br>sauvage (Fr) | fruit, bark    | D, EN                    | galactagogue, infertility, menstruation                         | 1356              |
| <i>Justicia secunda</i> Vahl                                       | fleur rouge (Fr)                    | plant, leaves  | T                        | anemia                                                          | 805, 986          |
| <i>Keetia</i> sp.                                                  | ratta (F)                           | bark, leaves   | D, VI                    | infertility, menstruation, vaginal cleanse                      | 766               |
| <i>Lagenaria</i> cf. sp.                                           | calabasse (Fr), londuh<br>(F)       | fruit          | B                        | placenta removal                                                | NC                |
| <i>Laggera</i> cf. <i>alata</i> (D.Don) Sch.Bip.<br>ex Oliv.       | tabac de pygmée (Fr)                | leaves         | D                        | fibroids, cysts                                                 | NC                |
| <i>Landolphia</i> cf. <i>owariensis</i> P.Beauv.                   | pondzie                             | leaves         | D                        | anemia, galactagogue, contraception                             | NC                |
| <i>Lantana camara</i> L.                                           |                                     | leaves         | T                        | malaria                                                         | 1188              |
| <i>Laportea</i> cf. <i>aestuans</i> (L.) Chew                      | terakun (F)                         | plant          | E, VI                    | childbirth                                                      | NC                |
| <i>Laportea</i> cf. <i>ovalifolia</i> (Schumach.<br>& Thonn.) Chew | dipakazangoue (Ok)                  | leaves         |                          | contraception                                                   | NC                |
| <i>Leea guineense</i> G.Don                                        | mbala (Om)                          | bark           | D                        | childbirth                                                      | NC                |
| Leguminosae sp.                                                    |                                     | bark           | T                        | menstruation                                                    | 1304              |
| <i>Lippia adoensis</i> Hochst. ex Walp.                            | mututu                              | leaves         | T                        | galactagogue                                                    | NC                |
| <i>Lippia</i> cf. <i>rugosa</i> A.Chev.                            | afing (F)                           | leaves         | T                        | galactagogue                                                    | 760               |
| <i>Lippia multiflora</i> Moldenke                                  | punya (S), tisane<br>sauvage (Fr)   | leaves         | T                        | HBP, galactagogue                                               | 1410              |
| <i>Lippia</i> sp.                                                  | lewayi (Ob)                         | leaves         | D                        | menstruation, postpartum cleanse, postpartum<br>hemorrhage      | 1179              |
| <i>Macaranga spinosa</i> Müll.Arg                                  | asas (F)                            | leaves         | HB, E, SB, VI            | pregnancy, menstruation, vaginal cleanse, diarrhea              | 1192, 1197        |
| <i>Maesopsis eminii</i> Engl.                                      | enkale (F), mongobe<br>(B)          | bark           | EN, T                    | infertility, galactagogue                                       | 879               |

| <b>Botanical Name</b>                               | <b>Local Name<sup>a</sup></b> | <b>Used part</b>    | <b>Preparation<sup>b</sup></b> | <b>Use category<sup>c</sup></b>                                                                              | <b>AMT#<sup>d</sup></b> |
|-----------------------------------------------------|-------------------------------|---------------------|--------------------------------|--------------------------------------------------------------------------------------------------------------|-------------------------|
| <i>Mangifera indica</i> L.                          | mangue (Fr)                   | bark, leaves        | VW, T                          | menstruation, postpartum infections, STIs, stomachache                                                       | 839                     |
| <i>Manihot esculenta</i> Crantz                     | manioc (Fr)                   | leaves, tuber       | E, EN, D                       | childbirth, galactagogue, postpartum hemorrhage, pregnancy                                                   | NC                      |
| <i>Mikania chenopodifolia</i> Willd.                | madamoiselle (Fr)             | plant               | SiB                            | pregnancy                                                                                                    | 1242                    |
| <i>Milicia excelsa</i> (Welw.) C.C.Berg             | abang (F)                     | leaves, bark        | D                              | galactagogue                                                                                                 | 835, 836, 1368          |
| <i>Millettia cf. versicolor</i> Baker               | banjanjoko (B)                | bark                | T                              | general good health                                                                                          | 1306                    |
| <i>Momordica charantia</i> L.                       | mabubulu                      | leaves              | D                              | contraception                                                                                                | NC                      |
| <i>Morinda lucida</i> Benth.                        | akon (F)                      | bark                | HB, T, EN                      | HBP, intestinal cleanse, pregnancy                                                                           | 1213                    |
| <i>Musa</i> sp.                                     | umbolokon (F)                 | leaves, fruit, bark | D, E, EN, SB                   | anemia, backache, childbirth, galactagogue, menstruation, placenta removal, STIs, vaginal cleanse, vermifuge | NC                      |
| <i>Musanga cecropioides</i> R.Br. ex Tedlie         | mohombo (B)                   | leaves              | D                              | childbirth                                                                                                   | 985, 1309               |
| <i>Myrianthus arboreus</i> P.Beauv.                 | angokon (F)                   | bark                | D, EN                          | pregnancy, postpartum cleanse, postpartum infections                                                         | 853, 1073               |
| <i>Nicotiana tabacum</i> L.                         | taba (F)                      | leaves              | EN                             | CBD zchaw, pregnancy                                                                                         | NC                      |
| <i>Nymphaea lotus</i> L.                            | otoetoe (F)                   | leaves              | VI                             | vaginal cleanse                                                                                              | NC                      |
| <i>Ocimum americanum</i> L.                         | sizey (S)                     | leaves              | T, D                           | galactagogue, placenta, postpartum cleanse                                                                   | 1407, 1142              |
| <i>Ocimum gratissimum</i> L.                        | messep (F), masipetzipo (Os)  | leaves, plant       | D, T, VI                       | galactagogue, malaria, menstruation, pregnancy, vaginal cleanse, vaginal cleanse                             | 1072, 1409, 1412, 1143  |
| <i>Ocimum</i> sp.                                   | dziandzie (P)                 | leaves              | D                              | fibroids, cysts                                                                                              | NC                      |
| <i>Oryza sativa</i> L.                              | riz (Fr)                      | seed                | E                              | galactagogue                                                                                                 | NC                      |
| <i>Passiflora foetida</i> L.                        | ejeszum (F)                   | stem, leaves        | EN                             | infertility, vermifuge                                                                                       | 849                     |
| <i>Pentaclethra macrophylla</i> Benth.              | mpandzi (M), ompie (T)        | bark, fruit         | EN, D, VW, E                   | pregnancy, stomachache, vaginal cleanse                                                                      | 1077, 1263              |
| <i>Perichasma cf. laetificata</i> Miers             | enzigue (F)                   | root                | E                              | pregnancy                                                                                                    | NC                      |
| <i>Periploca nigrescens</i> Afzel.                  | alarminson (F)                | leaves              | VI                             | vaginal cleanse                                                                                              | NC                      |
| <i>Persea americana</i> Mill.                       | avocat (Fr)                   | leaves              | T, VI                          | HBP, vaginal cleanse                                                                                         | 982                     |
| <i>Petersianthus macrocarpus</i> (P.Beauv.) Liben   | abing (F)                     | bark, leaves        | L, SiB, D, S, VI               | anemia, backache, pregnancy, vaginal cleanse                                                                 | 1220                    |
| <i>Phyllanthus</i> sp.                              | kanguh (F)                    | plant               | VI                             | vaginal cleanse                                                                                              | 1245                    |
| <i>Picralima nitida</i> (Stapf) T.Durand & H.Durand | dumavendo (B, M)              | fruit, bark         | EN, D                          | fibroids, cysts, malaria, vermifuge, HBP                                                                     | 1250, 1316              |
| <i>Piper umbellatum</i> L.                          | abomanzan (F)                 | plant, leaves       | SiB, EN, SB                    | hemorrhoids, infertility, placenta removal, pregnancy, vaginal cleanse                                       | 761                     |
| <i>Piptadeniastrum africanum</i> (Hook.f.) Brenan   | nlouey (F)                    | leaves, bark        | L, EN                          | CBD mfoes, infertility                                                                                       | 1219                    |
| <i>Pistia cf. stratiotes</i> L.                     | angoun (F)                    | plant               | E                              | infertility                                                                                                  | NC                      |
| <i>Plagiocladus diandrus</i> (Pax) Jean             | mbango (B)                    | leaves              | E                              | anemia, HBP                                                                                                  | 1260                    |

| Botanical Name                                          | Local Name <sup>a</sup>             | Used part           | Preparation <sup>b</sup> | Use category <sup>c</sup>                                                   | AMT# <sup>d</sup>                       |
|---------------------------------------------------------|-------------------------------------|---------------------|--------------------------|-----------------------------------------------------------------------------|-----------------------------------------|
| F.Brunel                                                |                                     |                     |                          |                                                                             |                                         |
| <i>Plagiostyles africana</i> (Müll.Arg.) Prain          | eleesula (F)                        | bark                | EN                       | menstruation, postpartum infections                                         | NC                                      |
| <i>Plectranthus monostachyus</i> (P.Beauv.) B.J.Pollard | echipo (M)                          | plant               | D                        | headache                                                                    | 1319                                    |
| <i>Poga oleosa</i> Pierre                               | oayko (M)                           | plant               | EA                       | sores                                                                       | 1314                                    |
| <i>Portulaca oleracea</i> L.                            | dikamiya (Ok)                       | leaves              | T                        | childbirth                                                                  | 1402                                    |
| <i>Pseudospondias longifolia</i> Engl.                  | ofoss (F)                           | bark                | D, EN, T                 | anemia, stomachache                                                         | 1081                                    |
| <i>Psidium guajava</i> L.                               | guave (Fr)                          | leaves              | SB                       | malaria, vaginal cleanse                                                    | NC                                      |
| <i>Pteridium aquilinum</i> (L.) Kuhn                    | ebango (B)                          |                     |                          | childbirth                                                                  | 1274                                    |
| <i>Pterocarpus soyauxii</i> Taub.                       | umbel (F), kaolin rouge (Fr)        | bark                | D, T, SiB                | anemia, galactagogue, infertility, placenta removal, pregnancy, STIs        | 880, 1203                               |
| <i>Pycnanthus angolensis</i> (Welw.) Warb.              | mitchoko (B)                        | bark                | T                        | anemia                                                                      | NC                                      |
| <i>Quassia cf. africana</i> (Baill.) Baill.             | icindural (P)                       | root                | T                        | HBP                                                                         | 763                                     |
| <i>Rauvolfia vomitoria</i> Afzel.                       | tchwele (Ob)                        | bark                | SiB                      | menstruation                                                                | 1161                                    |
| <i>Saccharum officinarum</i> L.                         | canne sucre (Fr)                    | juice, stem, plant  | D, EN, T                 | fibroids, cysts, HBP, menstruation                                          | 829                                     |
| <i>Santiria cf. trimera</i> (Oliv.) Aubrév.             | outou (F)                           | resin, bark         | S                        | CBD zchaw                                                                   | NC                                      |
| <i>Sarcocephalus latifolius</i> (Sm.) E.A.Bruce         | ondolo (Ob)                         | fruit, bark         | D, EN                    | galactagogue, stomachache                                                   | 1156                                    |
| <i>Scleria boivinii</i> Steud.                          | zengey (B)                          | leaves              | D                        | postpartum hemorrhage, stomachache                                          | 1307                                    |
| <i>Scoparia dulcis</i> L.                               | nzonzo (F), zedsoro (F)             | leaves              | D                        | childbirth                                                                  | 1364                                    |
| <i>Scyphocephalum cf. ochocoa</i> Warb.                 | sogo (F)                            | bark                | E                        | menstruation                                                                | NC                                      |
| <i>Selaginella myosurus</i> Alston                      | ehoyi (M), mahoy (B)                | leaves              | E                        | pregnancy, HBP                                                              | 1063, 1198                              |
| <i>Senna alata</i> (L.) Roxb.                           | kinkiliba (F)                       | leaves              | D, T, S                  | infertility, STIs                                                           | 1320                                    |
| <i>Senna occidentalis</i> (L.) Link                     | ngari (Ob)                          | leaves              | EA, E                    | stomachache                                                                 | 1184, 1366                              |
| <i>Sida acuta</i> Burm.f.                               | nzisim (F)                          | leaves, stem, plant | D, EN, W, SiB, VI        | childbirth, CBD ona/onyaboom, CBD les urines, pregnancy, postpartum cleanse | 828, 1401, 1177, 1406, 1151, 1254, 1237 |
| <i>Solanecio angulatus</i> (Vahl) C.Jeffrey             | moyambo (B)                         | leaves              | D                        | childbirth                                                                  | 1298                                    |
| <i>Solanum americanum</i> Mill.                         | otchango (M)                        | leaves              | E, D                     | pregnancy                                                                   | NC                                      |
| <i>Solanum anguivi</i> Lam.                             | petit aubergine (Fr), ombororu (Ob) | fruit               | D, T                     | galactagogue, menstruation, postpartum cleanse, postpartum hemorrhage       | NC                                      |
| <i>Solanum lycopersicum</i> Lam.                        | tomate (Fr)                         | fruit               | D                        | anemia                                                                      | NC                                      |
| <i>Strychnos cf. sp.</i>                                |                                     | bark                | SiB                      | vaginal cleanse                                                             | NC                                      |
| <i>Tabernanthe iboga</i> Baill.                         | bois sacre (Fr)                     | root                | E                        | anemia, contraception, HBP                                                  | NC                                      |
| <i>Tetracera alnifolia</i> Willd.                       | movova/lian-aho (B)                 |                     | D                        | STIs                                                                        | 1259                                    |

| Botanical Name                                            | Local Name <sup>a</sup> | Used part           | Preparation <sup>b</sup> | Use category <sup>c</sup>                                      | AMT# <sup>d</sup> |
|-----------------------------------------------------------|-------------------------|---------------------|--------------------------|----------------------------------------------------------------|-------------------|
| <i>Tetrapleura tetraptera</i> (Schum. & Thonn.) Taub.     | tsélé (M)               | fruit               | T, EN                    | galactagogue, menstruation, pregnancy                          | NC                |
| <i>Tetrorchidium didymostemon</i> (Baill.) Pax & K.Hoffm. | zili (F)                | bark                | D, EN                    | galactagogue, infertility, menstruation, postpartum infections | 875               |
| <i>Theobroma cacao</i> L.                                 | cacaowey (F)            | bark, fruit, leaves | D, T                     | anemia, HBP, postpartum cleanse                                | 872, 1205         |
| <i>Tithonia diversifolia</i> (Hemsl.) A.Gray              | magariet (F)            | leaves              | D                        | HBP                                                            | NC                |
| <i>Treculia cf. acuminata</i> Baill.                      | mpovo (B)               | bark                | D                        | fetus strengthener                                             | 1262              |
| <i>Treculia erinacea</i> A.Chev.                          | edzip (F)               | bark                | T, EN                    | anemia, infertility                                            | NC                |
| <i>Trichoscypha cf. bijuga</i> Engl.                      | lokouta (B)             | leaves              | E                        | HBP                                                            | 1299              |
| <i>Trichoscypha</i> sp.                                   | aboet (F)               | bark                | VW                       | postpartum cleanse                                             | NC                |
| <i>Tristemma cf. hirtum</i> P. Beauv.                     | masessa                 | leaves              | VI                       | vaginal cleanse                                                | NC                |
| <i>Tristemma littorale</i> Benth.                         | abillebong (F)          | leaves              | VI                       | vaginal cleanse                                                | 861, 0873         |
| <i>Tristemma mauritianum</i> J.F. Gmel.                   |                         | leaves              | T                        | stomachache                                                    | 1084              |
| <i>Urena lobata</i> L                                     | okon (F)                | leaves              | D                        | postpartum hemorrhage                                          | 1238              |
| <i>Vernonia amygdalina</i> Delile                         |                         | leaves              |                          | stomachache                                                    | 1189              |
| <i>Xylopia aethiopica</i> (Dunal) A.Rich.                 | oha (M)                 | leaves              | E                        | HBP                                                            | 1321              |

<sup>a</sup> Local languages are abbreviated: (B)= Babungu; (F)= Fang;(Fr)= French; (M)= Mitsogo; (Ob)= Obamba; (Ok)= Okande; (Om)= Omiene; (Os)= Ossimba; (S)= Sake; (T)= Teke.

<sup>b</sup> Preparations are abbreviated: (B)= blow into it; (D)= drink; (E)= eat; (EA)= external application, (EN) = enema; (HB)= herbal bath; (L)= lay upon; (S)= scarification; (SB)= steambath; (SiB)= sitbath; (T)= tea; ( VW)= vaginal wash; (W)= waistband.

<sup>c</sup> Use category abbreviations are as follows: CBD= cultural bound disease; HBP = high blood pressure; STIs= sexually transmitted infections.

<sup>d</sup> Botanical voucher number and collector initials; NC= not collected.
